# Supplementary material
Source: publisher figshare collection journal article supplement (https://acs.figshare.com/ndownloader/files/4283196)
Supplement: Supplementary file 1 [file 4283196]

# Supporting Information

## Synthesis of Amphiphilic Alternating Polyesters with Oligo(ethylene glycol) Side Chains and Potential Use for Sustained Release Drug Delivery

Wei Wang<sup>†,§</sup>, Jianxun Ding<sup>†,‡,§</sup>, Chunsheng Xiao<sup>†,‡</sup>, Zhaohui Tang<sup>†</sup>, Di Li<sup>†</sup>, Jie Chen<sup>†</sup>, Xiuli Zhuang<sup>\*†</sup>, and Xuesi

Chen<sup>†</sup>

<sup>†</sup>Key Laboratory of Polymer Ecomaterials, Changchun Institute of Applied Chemistry, Chinese Academy of  
Sciences, Changchun 130022, P. R. China

<sup>‡</sup>Graduate University of Chinese Academy of Sciences, Beijing 100039, P. R. China

<sup>§</sup>These two authors are joint first authors.

Corresponding author: Xiuli Zhuang

E-mail address: zhuangxl@ciac.jl.cn

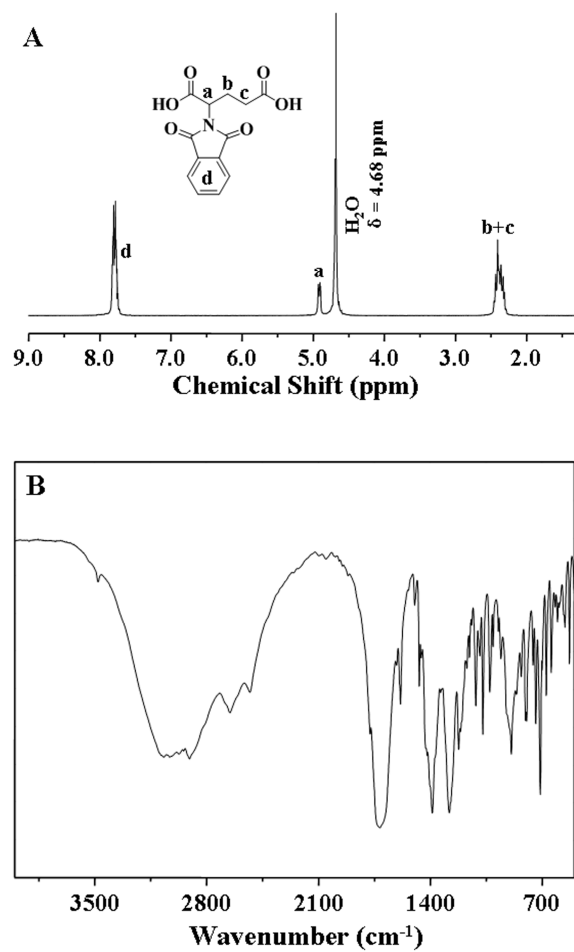

**Figure S1.**  $^1\text{H}$  NMR (in  $\text{D}_2\text{O}$ ) (A), and FT-IR (B) spectra of 2-(1,3-dioxoisindolin-2-yl)pentanedioic acid.

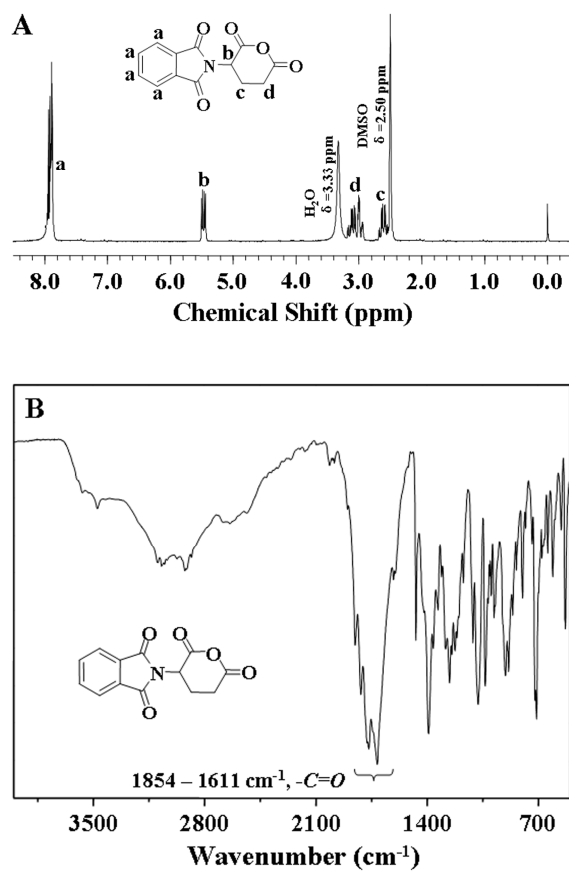

**Figure S2.**  $^1\text{H}$  NMR (in  $\text{DMSO}-d_6$ ) (A), and FT-IR (B) spectra of PGA monomer.

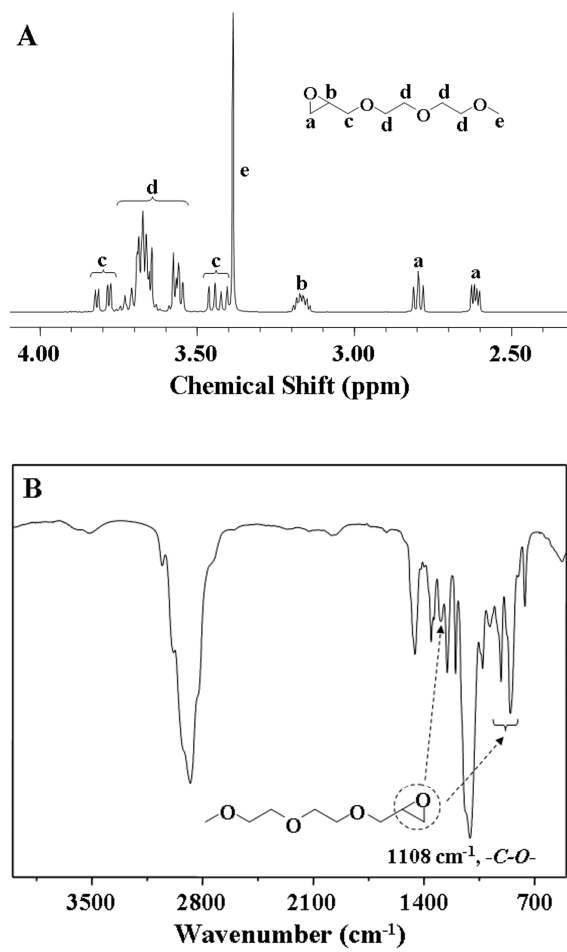

**Figure S3.** <sup>1</sup>H NMR (in CDCl<sub>3</sub>) (A), and FT-IR (B) spectra of ME<sub>2</sub>MO monomer.

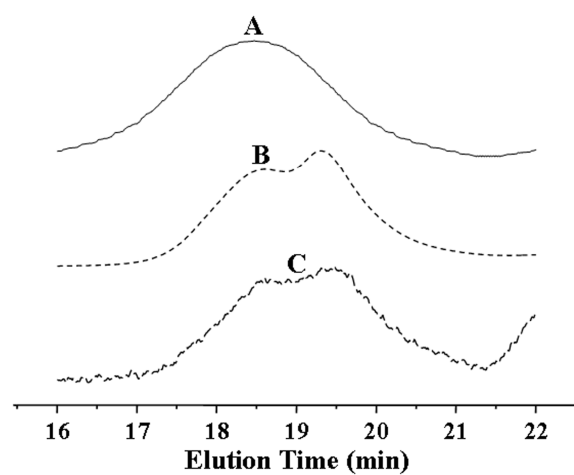

**Figure S4.** GPC spectra of Rifampin-loaded P(PGA-*co*-ME<sub>2</sub>MO)<sub>47</sub> after Rifampin release at pH 7.4 (A), pH 5.5 (B) and pH 7.4 with 2 µg mL<sup>-1</sup> (0.08 U mL<sup>-1</sup>) proteinase K (C).
